# Supplementary material for: The impact of the COVID-19 pandemic on hospital utilisation in Sierra Leone
Source: HighWire-hosted journal article supplement (doi:10.1136/bmjgh-2021-005988), 2021-10-01
Supplement: bmjgh-2021-005988supp001_data_supplement.pdf [file bmjgh-2021-005988supp001_data_supplement.pdf]

|                       |                            | Province                     | Sector             | SV 2017 <sup>a</sup> |
|-----------------------|----------------------------|------------------------------|--------------------|----------------------|
| Eligible<br>(n=40)    | Included<br>(n=32)         | Eastern Province<br>(n=5)    | Governmental       | 556                  |
|                       |                            |                              | Governmental       | 228                  |
|                       |                            |                              | Governmental       | 1176                 |
|                       |                            |                              | Private non-profit | 88                   |
|                       |                            |                              | Private non-profit | 284                  |
|                       |                            | North West Province<br>(n=5) | Governmental       | 496                  |
|                       |                            |                              | Governmental       | 412                  |
|                       |                            |                              | Governmental       | 292                  |
|                       |                            |                              | Private non-profit | 808                  |
|                       |                            |                              | Private non-profit | na <sup>b</sup>      |
|                       |                            | Northern Province<br>(n=7)   | Governmental       | 884                  |
|                       |                            |                              | Governmental       | 852                  |
|                       |                            |                              | Private non-profit | 420                  |
|                       |                            |                              | Private non-profit | 740                  |
|                       |                            |                              | Private non-profit | 524                  |
|                       |                            |                              | Private non-profit | 392                  |
|                       |                            | Southern Province<br>(n=8)   | Private non-profit | 776                  |
|                       |                            |                              | Governmental       | 1764                 |
|                       |                            |                              | Governmental       | 32                   |
|                       |                            |                              | Governmental       | 652                  |
|                       |                            |                              | Governmental       | 116                  |
|                       |                            |                              | Private non-profit | 220                  |
|                       |                            | Western Area<br>(n=7)        | Private non-profit | 44                   |
|                       |                            |                              | Private non-profit | 1268                 |
|                       |                            |                              | Private non-profit | 1284                 |
|                       |                            |                              | Governmental       | 1484                 |
|                       |                            |                              | Governmental       | 92                   |
|                       |                            |                              | Governmental       | 2196                 |
|                       | Excluded<br>(n=8)          | Eastern Province<br>(n=2)    | Governmental       | 748                  |
|                       |                            |                              | Private non-profit | 900                  |
|                       |                            | Northern Province            | Private non-profit | 4372                 |
|                       |                            |                              | Private non-profit | 232                  |
| Southern Province     |                            | Governmental                 | 32 <sup>c</sup>    |                      |
|                       |                            | Private non-profit           | na <sup>b,c</sup>  |                      |
| Western Area<br>(n=4) |                            | Governmental                 | 776 <sup>d</sup>   |                      |
|                       |                            | Private non-profit           | na <sup>b,c</sup>  |                      |
|                       | Governmental               | 32 <sup>c</sup>              |                    |                      |
|                       | Private non-profit         | 96 <sup>c</sup>              |                    |                      |
| Not eligible (n=20)   | Eastern Province<br>(n=2)  | Private non-profit           | 1072 <sup>e</sup>  |                      |
|                       |                            | Private non-profit           | 132 <sup>c</sup>   |                      |
|                       | North West Province        | Private for-profit           | na <sup>b</sup>    |                      |
|                       |                            | Private for-profit           | 212                |                      |
|                       | Northern Province<br>(n=3) | Private for-profit           | 200                |                      |
|                       |                            | Private for-profit           | 288                |                      |
|                       |                            | Private for-profit           | 0                  |                      |
|                       | Southern Province<br>(n=3) | Private for-profit           | 52                 |                      |
|                       |                            | Private for-profit           | na <sup>b</sup>    |                      |
|                       |                            | Private for-profit           | na <sup>b</sup>    |                      |
|                       | Western Area<br>(n=11)     | Private for-profit           | 104                |                      |
|                       |                            | Private for-profit           | 0                  |                      |
|                       |                            | Private for-profit           | 96                 |                      |
|                       |                            | Private for-profit           | 0                  |                      |
|                       |                            | Private for-profit           | 44                 |                      |
|                       |                            | Private for-profit           | 12                 |                      |
|                       |                            | Private for-profit           | 144                |                      |
|                       |                            | Private for-profit           | na <sup>b</sup>    |                      |
|                       |                            | Private for-profit           | 164                |                      |
|                       |                            | Private for-profit           | 88                 |                      |
| Private for-profit    | na <sup>b</sup>            |                              |                    |                      |
| Private for-profit    | 52                         |                              |                    |                      |

Supplementary material Table 1: Inclusion and Exclusion of hospitals

<sup>a</sup>Surgical volume in 2017 Lindheim et al, Surgery 2021, <sup>b</sup>Not available, <sup>c</sup>Resource constraints,

<sup>d</sup>Inconsistency in data capture, <sup>e</sup>Did not share data.

### Data analysis plan

Data analysis will be performed using STATA.

The results will be presented in an automatically generated report, as tables and figures and as explanatory text.

Outcome variables are:

- Number of admissions to hospital by category
- Number of hospital beds occupied
- Number of intensive or critical care beds occupied
- Number of patients that can receive oxygen and the number of patients receiving oxygen
- Number of obstetric deliveries
- Numbers of caesarean sections.
- Number of surgical operations
- Number of hernia operations
- Available surgical and anaesthesia providers
- Number of referrals using the referral coordinator resource

All outcome variables are continuous; they will be described as mean and sd (or n and % of total) for each successive weekly time interval.

They will be shown in total, and disaggregated by facility type, geographical area, sex (where appropriate), and by category of patient (e.g: pediatric, medical, surgical, maternity).

Data will not be analysed or shown by individual named facility.

To ensure comparability, when analysing data from the quantitative study, only data from facilities that have taken part in all three study elements will be used.

Comparison between outcome variables collected at each timepoint (T) will be made with pre-COVID-19 data (T0) using Student's T-test. Trends in mean (sd) for each outcome variable at each timepoint (T1-x) will be shown graphically and comparisons between each outcome over time made using ANOVA.

Effects of factors (such as facility level or geographical location) on outcomes will be explored using multivariate regression
